# Supplementary material for: Pediatric Kawasaki Disease and Adult Human Immunodeficiency Virus Kawasaki-Like Syndrome Are Likely the Same Malady
Source: PubMed Central journal article supplement — Open Forum Infect Dis. 2016 Sep 29;3(3):ofw160. doi: 10.1093/ofid/ofw160 (PMC5047405; doi:10.1093/ofid/ofw160), 2016-09-29
Supplement: supp_ofw160_ofw160supp.pdf [file supp_ofw160_ofw160supp.pdf]

## **Supplemental Data**

### **Case 1**

Patient 1 was a 23 year old male admitted with several days of fevers, rash, strawberry tongue, painful swelling of hands/feet, and non-exudative conjunctivitis, preceded by diarrhea and abdominal pain beginning about 1 week prior to admission (physical findings; Figure 1). Admission evaluation included new diagnoses of HCV and AIDS. He was treated with multiple antibiotics without improvement and after 1 week, he remained febrile (103.9° F), with episodes of hypotension, and was transferred to the ICU for impending vascular collapse. His CXR showed increased interstitial markings; a bronchoscopy/BAL with negative stains for PCP, yeasts, molds, viral, or bacterial pathogens; cultures grew a few *Candida albicans*. Evaluation for other infectious agents was negative (Supplemental Table 1). On day 9 he became severely hypotensive requiring fluid resuscitation and high dose pressors while on empiric high dose hydrocortisone, vancomycin, meropenem, doxycycline, amphotericin, and metronidazole. An echocardiogram showed hyperdynamic ventricles with preserved function. Ultimately, the diagnosis of KLS was considered. Without other changes he received 2 gm/kg of IVIG. Aspirin was not initiated due to platelet count of 33; methylprednisolone was added to hydrocortisone. Hypotension and fevers rapidly responded to the IVIG with resolution of fevers and tapering pressors to off within 24 h. Four days later fevers relapsed on methylprednisolone without clinical deterioration, and resolved with initiation of aspirin therapy and discontinuation of antimicrobials. He developed desquamation of the fingers and toes, and around the eyes, with sloughing of his tongue epithelium. He was discharged home on day 11 after IVIG#2 on 165 mg aspirin daily, a rapid prednisone taper, and prophylaxis for PCP/MAC. The patient had follow up visits at one, five, and thirteen weeks. He started cART with subsequent immune reconstitution (absolute CD4 293; HIV viral load <50 copies/ml). He had a negative cardiac stress thallium at 6 months and discontinued ASA. With the patient's permission serum collected immediately prior to IVIG#1 and 13 weeks post discharge was stored at -80° C. The patient did not have a KLS recurrence during the next 5 years.

### **Case 2**

Patient 2 was a 31 year old male recently diagnosed with HIV (CD4 count 19, viral load 139,000 copies/ml) and idiopathic eosinophilia, admitted with ten days of fever (102.7° F), myalgias, mild abdominal pain with diarrhea and painful swelling of the hands and feet coincident with 1<sup>st</sup> cART regimen. His exam was remarkable for non-exudative conjunctivitis,

cracked lips, mild thrush, non-tender cervical lymphadenopathy, impressive painful swelling of the hands and feet, and a rash. cART was held. The working diagnoses were drug reaction *versus Chlamydia*-associated reactive arthritis. On day 5 the patient remained febrile (103° F); all testing was negative including *Chlamydia* (Supplemental Table 1). He was treated with 2 gm/kg IVIG plus ASA 325 mg qid. During the IVIG infusion he defervesced and had no further fevers, felt remarkably better and was discharged the following day on fluconazole, prior cART, ASA 325 mg bid, MAC prophylaxis with plan to initiate PCP prophylaxis during follow up. He returned to ID clinic at 2 and 5 weeks and was well on both visits. He had periungual desquamation of the hands at the 2 week visit as typically seen in KD. With the patient's permission, serum collected immediately prior to IVIG and 5 weeks post discharge were stored at -80° C. He had no KLS recurrences in the subsequent 5 years.

### **Statistical Analyses**

For the HIV KLS study, data was analyzed as individual comparisons of patient 1 and patient 2 acute and convalescent values to the combined analyte data from the three asymptomatic HIV<sup>+</sup> control subjects with a Student's t-test. Results from the seronegative control "normal serum" were not included in the analysis. For within-the-study statistical comparisons, *p values* of <0.05 are considered statistically significant. Correction for multiple comparisons were not performed because analytes in the panel had previously been reported to be elevated in KLS or KD, or were logically linked with KLS pathogenesis (*Ccl1*, IL-13, and *Cxcl11*). A power calculation was performed for analytes of interest (elevated in both KLS patients with *p values* <0.05) to estimate the sample size in a follow up study to confirm/refute the preliminary data. Power calculation results are included in the figure legends for analytes of interest. Power analyses were performed with an alpha level of 0.05 and power level of 0.80 (beta level = 0.20), with means and standard deviations based off of values derived from this pilot study with three controls and one case (thus weighted at a three to one ratio). As the standard deviation of the case arm could not be estimated based on a single typical KLS case, it was assumed to be the same as the standard deviation as the HIV control arm for power analysis purposes, an assumption not likely valid for all analytes, and likely problematic for analytes that do not approximate zero in asymptomatic HIV<sup>+</sup> individuals.

For the pediatric KD study, in Step 1 the acute phase reactants IL-6, sTNFR1, and sTNFR2 were analyzed by one-way ANOVA with multiple comparison correction (GraphPad Prism version 5.00) to test if there are differences among KD, FC, and HC samples. A ROC analysis showed that a TNFR1 <2000 and TNFR2 <1900 pg/ml removed the same set of samples (all HC and 3 FC). In Step 2, for each of the remaining analytes a T-test with Welch correction was performed to determine whether levels in KD and FC were different, along with an ROC analysis to find optimal cutoffs. ROC analysis showed that *Ccl1*, *Ccl2*, and *Cxcl11* were useful predictors of KD *versus* FC. Using sample 12 (KD) and sample 26 (FC) to educate, at least two of the predictors needed to be above their cutoffs to classify these two samples correctly. Data points were considered to be outliers if the value was >5-fold higher than the mean of the experimental group, and if the corresponding paired serum or plasma value was not within 5-fold of the questionable value. Of 416 values in the study 3 met outlier criteria (white boxes in Supplemental tables 5 and 6). Two were in the healthy controls (I-TAC) and one in a febrile control (I-TAC), suggesting possible slight technical issues specific to the I-TAC analyte assay. Outlier values were not used during performance of the KD *versus* FC t-tests or for ROC analysis. Including or excluding the outlier data had no impact on the result of applying the KD diagnostic algorithm. The subjects with outlier values had the possibility of a KD diagnosis rejected at step1 based on sTNFR2 levels <1900 pg/ml.

**Table 1- Diagnostic Testing**

| Diagnostic Test             | Patient 1<br>KLSS (shock)   | Patient 2<br>KLS                                |
|-----------------------------|-----------------------------|-------------------------------------------------|
| Admission WBC               | 5.8                         | 3.5                                             |
| CD4 count                   | 3                           | 19                                              |
| HIV vl                      | 180,000                     | 139,000                                         |
| HCV studies                 | 1a                          | neg                                             |
| HBV sAg                     | neg                         | neg                                             |
| Oral HSV culture            | neg                         | ND                                              |
| CXR                         | NAD                         | NAD                                             |
| Urinalysis                  | 2 WBC                       | 0 WBC                                           |
| CSF                         | ND                          | 1 WBC                                           |
| ESR                         | 5                           | 87                                              |
| ANA                         | ND                          | <1:40                                           |
| LDH                         | 1370                        | ND                                              |
| Ig A level                  | 531                         | 267                                             |
| ASO titer (ULN <199)        | 200                         | 200                                             |
| Strep screen                | neg                         | ND                                              |
| RPR                         | neg                         | neg                                             |
| Monospot                    | neg                         | neg                                             |
| EBV IgM                     | neg                         | neg                                             |
| CMV IgM                     | neg                         | neg                                             |
| Toxo IgM                    | neg                         | ND                                              |
| Erhlichea pcr               | neg                         | ND                                              |
| Parvovirus B19 pcr          | neg                         | ND                                              |
| Parvovirus B19 IgM          | ND                          | neg                                             |
| HHV6 pcr                    | neg                         | ND                                              |
| Urine <i>Histoplasma</i> ag | neg                         | neg                                             |
| Serum cryptococcal ag       | ND                          | neg                                             |
| Blood cultures              | neg                         | neg                                             |
| Stool culture/O&P           | neg                         | neg                                             |
| <i>Chlamydia</i> /GC LCR    | ND                          | neg                                             |
| Nasopharynx viral cult.     | neg                         | neg                                             |
| BAL stains                  | neg                         | ND                                              |
| BAL culture                 | few <i>Candida</i>          | ND                                              |
| BM bx stains & cultures     | neg                         | ND                                              |
| Skin bx                     | perivascular<br>lymphocytes | perivascular<br>lymphocytes, few<br>eosinophils |

NAD = no active disease

ND = not determined

**Table 2- Analyte Panel**

| Analyte               | Cell type origin                                                                                                     | Ref.     | KD serum                    | KD ref.     |
|-----------------------|----------------------------------------------------------------------------------------------------------------------|----------|-----------------------------|-------------|
| <b>IL-1beta</b>       | Multiple                                                                                                             | [1]      | Elevated                    | [2]         |
| <b>IL-1ra</b>         | Multiple excepting lymphocytes                                                                                       | [3]      | <b>No data</b>              | <b>NA</b>   |
| <b>IL-6</b>           | Multiple including T cells                                                                                           | [4, 5]   | Elevated                    | [6-8]       |
| <b>IL-10</b>          | Hematopoetic cells including T cells                                                                                 | [9]      | Elevated                    | [10, 11]    |
| <b>IL-13</b>          | T cells (Th2), eosinophils, mast cells                                                                               | [12-14]  | <b>No data</b>              | <b>NA</b>   |
| <b>IL-17</b>          | T cells (Th17 & some Th1, rare CD8)                                                                                  | [15]     | Elevated                    | [16, 17]    |
| <b>IFN-a</b>          | Multiple                                                                                                             |          | Conflicting                 | [18, 19]    |
| <b>IFN-g</b>          | T cells (Th1)                                                                                                        | [20]     | Not elevated<br>In majority | [21, 22]    |
| <b>TNFa</b>           | Multiple including T cells                                                                                           | [23]     | Elevated                    | [7, 24, 25] |
| <b>sTNFRII</b>        | Multiple, regulated by TNFa                                                                                          | [26]     | Elevated KD &<br>KLS        | [24, 27]    |
| <b>M-CSF</b>          | Mesenchymal cell types (endothelium, fibroblasts)                                                                    | [28]     | Elevated                    | [29, 30]    |
| <b>Osteoprotegrin</b> | Osteoblasts, endothelial and smooth muscle cells                                                                     | [31]     | Elevated                    | [32]        |
| <b>Ccl1 (I-309)</b>   | Monocytes, T cells, endothelial cells; recruits Th2 T cells, monocytes, endothelial and smooth muscle cells          | [33-36]  | <b>No data</b>              | <b>NA</b>   |
| <b>Ccl2 (MCP-1)</b>   | Monocytes & stromal cells (epithelium, endothelium, fibroblasts, smooth muscle cells)                                | [37]     | Elevated                    | [38-40]     |
| <b>Ccl5 (Rantes)</b>  | Multiple                                                                                                             | [41]     | Elevated                    | [42]        |
| <b>Cxcl10 (IP-10)</b> | Multiple, regulated by interferons                                                                                   | [43]     | Elevated                    | [17, 40]    |
| <b>Cxcl11 (I-TAC)</b> | Endothelial, epithelial cells and leukocytes; recruitment of T cells and non-homeostatic recruitment of plasma cells | [44, 45] | <b>No data</b>              | <b>NA</b>   |

- **NA** = not applicable

**Table 3- KLS Multiplex ELISA data**

|                  | <b>hIL13</b> | <b>hMCP1</b> | <b>hIL6</b>  | <b>hIL17</b> | <b>hTNFRII</b> | <b>hIP10</b> | <b>hRANTES</b> | <b>hITAC</b> |
|------------------|--------------|--------------|--------------|--------------|----------------|--------------|----------------|--------------|
| <u>Sample ID</u> | <u>pg/ml</u> | <u>pg/ml</u> | <u>pg/ml</u> | <u>pg/ml</u> | <u>pg/ml</u>   | <u>pg/ml</u> | <u>pg/ml</u>   | <u>pg/ml</u> |
| #1               | 510.4        | 100200       | 54000        | 171.2        | 25700          | 125.8        | 15700          | 1935         |
| #2               | 286          | 566.8        | 23           | 458.2        | 3120           | 70.8         | 34000          | 1050.5       |
| #3               | 502.4        | 2510         | 40           | 190.8        | 5540           | 72.6         | 156600         | 1099.5       |
| #4               | 163.6        | 358          | 11.8         | 107.4        | 2765           | 56.4         | 30300          | 59.2         |
| #5               | 204          | 361          | 11           | 132          | 955            | 51.2         | 86200          | 17.8         |
| #6               | 218.6        | 529.8        | 11           | 250.8        | 690            | 51           | 29700          | 21.8         |
| #7               | 104.2        | 115.6        | 12.6         | 130.2        | 934.6          | 55           | 45600          | 104.6        |
| #8               | 93.6         | 161.2        | 7.4          | 100          | 975.1          | 51.2         | 39700          | 10           |

|                  | <b>hOPG</b>  | <b>hM-CSF</b> | <b>hTNFa</b> | <b>hIL10</b> | <b>hIL1ra</b> | <b>hI309</b> | <b>hIFNa</b> | <b>hIL1b</b> |
|------------------|--------------|---------------|--------------|--------------|---------------|--------------|--------------|--------------|
| <u>Sample ID</u> | <u>pg/ml</u> | <u>pg/ml</u>  | <u>pg/ml</u> | <u>pg/ml</u> | <u>pg/ml</u>  | <u>pg/ml</u> | <u>pg/ml</u> | <u>pg/ml</u> |
| #1               | 27.8         | 62.4          | 60.4         | 14.4         | 25050         | 48.4         | <0.8         | <0.4         |
| #2               | 8.4          | 88            | <4.7         | 2.4          | 361.6         | 4.8          | 5.8          | <0.4         |
| #3               | 9.4          | 58.4          | <4.7         | 1.4          | 882.8         | 55.6         | 46.2         | <0.4         |
| #4               | 1.2          | <15.6         | <4.7         | 0.4          | 38.8          | 4.8          | 14.8         | <0.4         |
| #5               | 0.8          | <15.6         | <4.7         | 0.8          | <15.6         | <1.6         | <0.8         | <0.4         |
| #6               | 0.4          | <15.6         | <4.7         | 0.6          | 33.6          | <1.6         | <0.8         | <0.4         |
| #7               | 4            | <15.6         | <4.7         | 4.2          | 134.4         | 3.6          | <0.8         | <0.4         |
| #8               | 0.8          | <15.6         | <4.7         | 1.2          | 2048.8        | 20.8         | <0.8         | <0.4         |

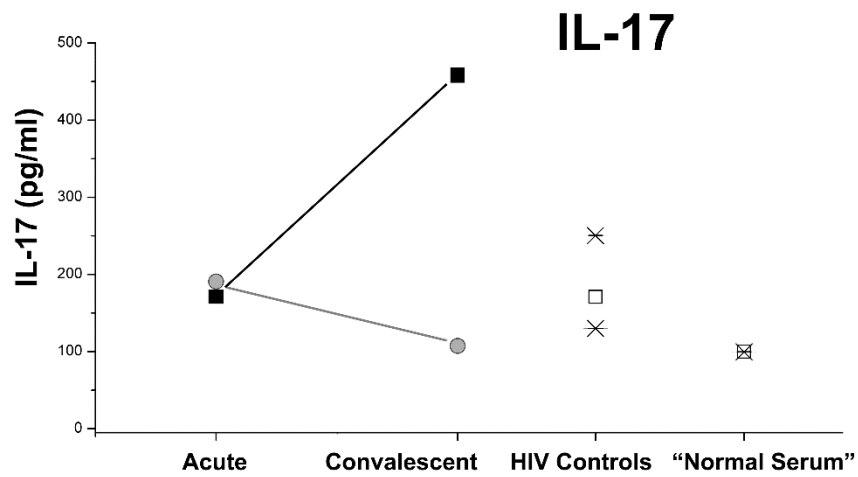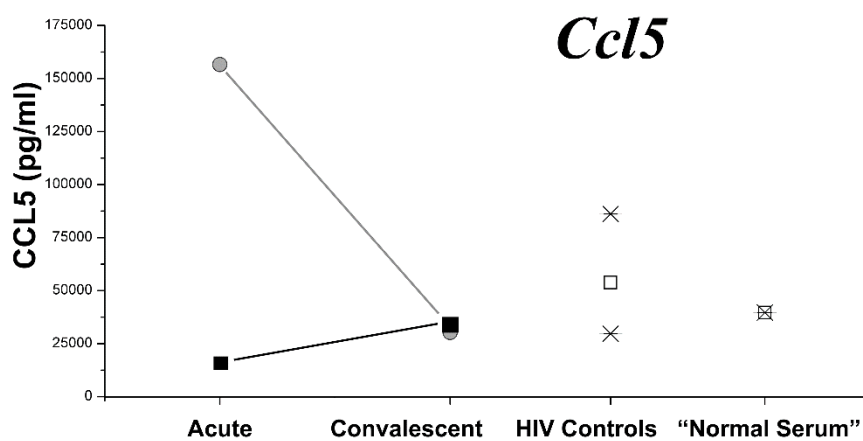

**Figure 1.** IL-17 and *Ccl5* did not differ between KLS patients and HIV controls. Patient 1 (severe KLS) black squares; Patient 2 (typical KLS) gray circles. The HIV control subjects' mean (open square) and range of analyte values are indicated in the third column. The level of analyte in a single HIV negative "normal serum" is shown as a square in the final column.

**Table 4- KLS/KD Acute Phase Analytes**

| Analyte (pg/ml)                   | This report       |                      | Control | KD (KLS)       | Other disease 1            | Other disease 2       | Reference |
|-----------------------------------|-------------------|----------------------|---------|----------------|----------------------------|-----------------------|-----------|
|                                   | HIV controls Mean | HIV KLS P1, P2       |         |                |                            |                       |           |
| IL-1beta                          | <0.4              | <0.4, <0.4           | 310     | 1110           | -                          | -                     | [2]       |
| IL-1ra                            | 59                | 25050, <b>882</b>    | 410     | <b>no data</b> | 7400 (urosepsis)           | -                     | [46]      |
| IL-6                              | 12                | 54000, <b>40</b>     | <5      | 123            | 26 (enterovirus)           | -                     | [8]       |
|                                   |                   |                      | 1.5     | 164            | 6 (febrile illness)        | -                     | [7]       |
| IL-10                             | 1.9               | 14, <b>1.4</b>       | 16      | 125            | 27 (febrile illness)       | -                     | [47]      |
|                                   |                   |                      | 4       | 122            | 34 (febrile illness)       | -                     | [10]      |
| IL-13                             | 176               | 510, <b>502</b>      | 35      | <b>no data</b> | 57 (RSV)                   | -                     | [48]      |
| IL-17                             | 171               | 171, <b>191</b>      | 2       | 25             | -                          | -                     | [49]      |
| IFN-a <sup>‡</sup>                | <0.8              | <0.8, <b>46</b>      | -       | -              | -                          | -                     | -         |
| IFN-g <sup>§</sup>                | <10               | 27, <b>&lt;10</b>    | -       | -              | -                          | -                     | -         |
| TNF-a                             | <5                | 60, <b>&lt;5</b>     | 10      | 24             | -                          | -                     | [25]      |
|                                   |                   |                      | <3.4    | 8              | <3.4 (measles)             | 12 (anaphylaxis)      | [50]      |
| sTNFRI                            | -                 | -                    | -       | 2750000        | 1550000 (encephalitis)     | -                     | [51]      |
| sTNFRII                           | 860               | 25700, <b>5540</b>   | -       | (>5000)        | -                          | -                     | [27]      |
| M-CSF*                            | <16               | 62, <b>58</b>        | -       | -              | -                          | -                     | -         |
| Osteoprotegerin                   | 2                 | 28, <b>9</b>         | 40      | 101            | 68 (JSLE)                  | 80 (febrile illness)  | [32]      |
| <i>Ccl1</i> (I-309)               | 1.9               | 48, <b>56</b>        | -       | -              | -                          | -                     | -         |
| <i>Ccl2</i> (MCP-1)               | 336               | 100200, <b>2510</b>  | -       | 443            | 83 (HSP)                   | 328 (febrile illness) | [40]      |
|                                   |                   |                      | 223     | 829            | -                          | -                     | [52]      |
| <i>Ccl5</i> (RANTES) <sup>†</sup> | 53833             | 15600, <b>156600</b> | 290     | 1320           | -                          | -                     | [39]      |
|                                   |                   |                      | -       | -              | -                          | -                     | -         |
| <i>Cxcl10</i> (IP-10)             | 52                | 126, <b>73</b>       | -       | 538            | 59 (HSP)                   | 417 (febrile illness) | [40]      |
|                                   |                   |                      | 128     | 2469           | -                          | -                     | [52]      |
| <i>Cxcl11</i> (I-TAC)             | 48                | 1935, <b>1100</b>    | -       | 3587           | 921 (febrile illness)      | -                     | [17]      |
|                                   |                   |                      | 68      | <b>no data</b> | 254 (HCV cryoglobulinemia) | -                     | [53]      |

P1= patient 1; P2 = patient 2

‡ conflicting data based on bioassays [18, 19]

§ published data in units/ml without conversion factor [21]

\* published data in units/ml without conversion factor [73]

† published data in arbitrary units mRNA in peripheral blood mononuclear cells (PBMC) [84]



# AUSHON BIOSYSTEMS

43 Manning Road  
 Billerica, MA 01821  
 Lab Director: Olga Pozdnyakova, M.D  
 Phone: ++1-978-436-6400

## Aushon Multiplex Immunoassay Analysis Report

Client/Study: Johnson  
 Institute: Yale University  
 Receive Date: 11/20/2015  
 SL Lot #: 7701

Species: Human  
 Matrix: Serum and Plasma  
 # of Samples: 78  
 Total Plex: 12

| TestID    | Sample D | hL1b  | hL4   | hL6    | hTAC   | hMCP1  | hL13  | hMIG   | hEchxn | hI309 | hMIP1b | hTNFR1 | hTNFR2 | Sample ID |
|-----------|----------|-------|-------|--------|--------|--------|-------|--------|--------|-------|--------|--------|--------|-----------|
|           | pg/ml    | pg/ml | pg/ml | pg/ml  | pg/ml  | pg/ml  | pg/ml | pg/ml  | pg/ml  | pg/ml | pg/ml  | pg/ml  | pg/ml  |           |
| Sample 2  | 2        | 0.5   | 0.3   | 1882.9 | 1312   | 1158.1 | 0.8   | 45.6   | 210.3  | 22.0  | 621.5  | 4529.8 | 2843.2 | 12005     |
| Sample 4  | 4        | 0.5   | 0.3   | 1882.9 | 565.2  | 1144.2 | 0.3   | 745.2  | 94.0   | 16.4  | 229.2  | 5696.2 | 4465.0 | 12015     |
| Sample 6  | 6        | 3.5   | 2.1   | 571.1  | 61.0   | 1201.8 | 0.059 | 151.5  | 189.6  | 9.7   | 486.7  | 3734.5 | 3107.1 | 12025     |
| Sample 8  | 8        | 30.5  | 12.1  | 53.0   | 39.5   | 1837.0 | 0.1   | 148.0  | 18.2   | 11.5  | 312.3  | 4128.9 | 2788.0 | 12035     |
| Sample 10 | 10       | 1.5   | 0.7   | 45.6   | 162.3  | 804.6  | 0.9   | 438.6  | 18.2   | 3.8   | 118.0  | 2913.6 | 1919.8 | 12045     |
| Sample 12 | 12       | 1.3   | 1.0   | 45.4   | 29.3   | 752.0  | 0.1   | 56.9   | 68.6   | 3.8   | 118.0  | 2913.6 | 1919.8 | 12055     |
| Sample 14 | 14       | 91.5  | 39.4  | 762.3  | 67.2   | 2876.9 | 19.2  | 990.1  | 242.8  | 169.9 | 738.4  | 5674.8 | 6497.2 | 12065     |
| Sample 16 | 16       | 0.3   | 0.099 | 27.3   | 68.9   | 983.5  | 1.1   | 100.5  | 77.6   | 36.9  | 328.8  | 3593.7 | 3585.6 | 12075     |
| Sample 18 | 18       | 9.8   | 4.3   | 93.5   | 40.7   | 574.3  | 1.3   | 93.2   | 50.1   | 15.0  | 299.7  | 3983.8 | 2924.1 | 12085     |
| Sample 60 | 60       | 14.1  | 3.3   | 85.6   | 3487.8 | 3288.9 | 0.2   | 1015.0 | 196.0  | 47.1  | 433.2  | 6201.8 | 4789.1 | 11015     |
| Sample 62 | 62       | 0.3   | 0.091 | 105.5  | 191.4  | 1389.7 | 0.087 | 211.3  | 194.7  | 9.7   | 4417.6 | 4417.6 | 3738.8 | 11025     |
| Sample 64 | 64       | 0.4   | 0.061 | 109.0  | 134.7  | 1389.6 | 0.033 | 44.6   | 522.0  | 4.0   | 144.3  | 5503.0 | 2940.9 | 11035     |
| Sample 66 | 66       | 0.4   | 0.2   | 354.2  | 108.7  | 1624.0 | 0.2   | 143.7  | 208.7  | 13.8  | 250.7  | 8845.2 | 8103.5 | 11045     |
| Sample 68 | 68       | 23.1  | 4.2   | 4.1    | 257.1  | 1458.7 | 0.057 | 80.5   | 788.9  | 21.9  | 250.0  | 2981.2 | 3419.6 | 11055     |
| Sample 70 | 70       | 2.9   | 1.3   | 20.7   | 484.9  | 2189.8 | 0.2   | 208.9  | 430.6  | 22.6  | 235.1  | 4738.3 | 3955.6 | 11065     |
| Sample 72 | 72       | 44.3  | 16.4  | 40.6   | 109.6  | 1366.2 | 6.5   | 298.6  | 478.2  | 18.1  | 399.7  | 2945.0 | 2631.4 | 11075     |
| Mean      |          | 15.0  | 6.7   | 278.7  | 371.2  | 2126.5 | 2.0   | 298.0  | 249.4  | 28.2  | 347.0  | 4930.4 | 4052.6 |           |
| SD        |          | 25.0  | 10.5  | 491.8  | 845.4  | 2515.9 | 4.9   | 327.6  | 215.0  | 40.9  | 174.4  | 1892.0 | 1829.8 |           |
| Sample 20 | 20       | 18.8  | 11.2  | 2.7    | 22.7   | 953.6  | 0.3   | 33.0   | 144.9  | 7.8   | 333.3  | 1917.4 | 1507.0 | 22005     |
| Sample 22 | 22       | 8.1   | 4.7   | 3.6    | 644.3  | 1071.4 | 0.6   | 58.1   | 718.5  | 3.9   | 194.5  | 1690.2 | 1485.9 | 22015     |
| Sample 24 | 24       | 2.8   | 1.7   | 30.0   | 14.0   | 650.8  | 0.8   | 18.9   | 61.2   | 4.1   | 198.4  | 2732.5 | 2198.5 | 22025     |
| Sample 26 | 26       | 3.5   | 1.2   | 33.4   | 16.0   | 792.3  | 6.2   | 174.4  | 83.4   | 2.6   | 215.7  | 4731.3 | 3198.1 | 22035     |
| Sample 28 | 28       | 0.8   | 0.6   | 8.0    | 33.7   | 266.4  | 0.013 | 14.5   | 93.5   | 3.1   | 317.3  | 2981.1 | 2106.6 | 22045     |
| Sample 30 | 30       | 0.4   | 0.051 | 15.2   | 25.0   | 399.7  | 0.024 | 30.7   | 99.4   | 4.9   | 364.8  | 3599.8 | 2310.5 | 22055     |
| Sample 32 | 32       | 7.3   | 4.6   | 21.2   | 31.4   | 653.2  | 0.8   | 20.4   | 140.3  | 3.5   | 230.3  | 1712.5 | 1302.3 | 22065     |
| Sample 34 | 34       | 14.2  | 5.0   | 24.7   | 15.9   | 677.5  | 0.9   | 72.6   | 83.6   | 3.5   | 280.4  | 3278.9 | 2062.7 | 22075     |
| Sample 36 | 36       | 8.5   | 3.7   | 165.4  | 39.3   | 499.7  | 0.066 | 37.9   | 51.4   | 4.2   | 331.2  | 6691.8 | 2803.7 | 22085     |
| Sample 38 | 38       | 0.4   | 0.037 | 25.5   | 11.3   | 506.1  | 0.4   | 14.6   | 73.6   | 3.6   | 1208.3 | 6900.0 | 3575.8 | 22095     |
| Sample 78 | 78       | 1.6   | 0.5   | 80.8   | 109.7  | 981.1  | 0.043 | 62.9   | 109.7  | 3.3   | 201.8  | 3430.9 | 2277.4 | 21035     |
| Mean      |          | 6.0   | 3.0   | 37.3   | 87.6   | 641.5  | 0.9   | 58.0   | 182.9  | 4.0   | 356.9  | 3566.9 | 2287.1 |           |
| SD        |          | 6.1   | 3.3   | 47.6   | 186.7  | 233.9  | 1.8   | 48.6   | 211.4  | 1.4   | 288.6  | 1822.3 | 708.1  |           |
| Sample 40 | 40       | 2.7   | 1.4   | 25.9   | 24.0   | 818.4  | 0.4   | 91.9   | 98.0   | 2.5   | 406.0  | 1632.4 | 1390.8 | 32005     |
| Sample 42 | 42       | 3.6   | 1.4   | 4.7    | 11.2   | 856.3  | 0.1   | 13.0   | 31.5   | 1.7   | 371.5  | 1527.4 | 882.9  | 32015     |
| Sample 44 | 44       | 0.1   | 0.2   | 18.7   | 23.2   | 382.7  | 0.4   | 36.7   | 34.6   | 2.9   | 193.4  | 1538.3 | 1190.9 | 32025     |
| Sample 46 | 46       | 1.9   | 1.5   | 6.8    | 3.3    | 1627.3 | 0.1   | 10.0   | 100.8  | 1.5   | 147.0  | 1623.3 | 1090.0 | 32035     |
| Sample 48 | 48       | 11.0  | 4.0   | 3.8    | 157.0  | 499.3  | 0.070 | 23.1   | 154.0  | 2.2   | 211.6  | 1772.3 | 1325.9 | 32045     |
| Sample 50 | 50       | 9.1   | 3.2   | 7.5    | 11.6   | 725.2  | 0.052 | 24.6   | 51.1   | 2.6   | 131.1  | 1725.8 | 1265.9 | 32055     |
| Sample 52 | 52       | 0.3   | 0.4   | 2.7    | 6.5    | 474.1  | 0.048 | 25.8   | 82.0   | 1.6   | 194.1  | 1137.3 | 1059.9 | 32065     |
| Sample 54 | 54       | 19.6  | 7.0   | 19.4   | 6.6    | 1011.9 | 0.037 | 15.4   | 198.1  | 2.1   | 227.3  | 1175.2 | 886.0  | 32075     |
| Sample 56 | 56       | 1.3   | 0.6   | 6.4    | 6.4    | 938.8  | 0.1   | 23.3   | 184.9  | 6.0   | 355.8  | 1331.6 | 1062.9 | 32085     |
| Sample 58 | 58       | 0.7   | 0.4   | 5.6    | 14.9   | 1068.3 | 0.043 | 36.8   | 68.3   | 4.8   | 373.4  | 1780.2 | 1070.0 | 32095     |
| Mean      |          | 6.0   | 2.0   | 9.9    | 26.5   | 842.0  | 0.140 | 41.6   | 104.8  | 2.8   | 281.1  | 1504.4 | 1115.2 |           |
| SD        |          | 6.3   | 2.2   | 7.9    | 46.4   | 367.5  | 0.134 | 41.2   | 48.8   | 1.5   | 704.0  | 238.4  | 168.9  |           |

Childrens KD samples

IU KD samples

Childrens Febrile controls  
 IU Febrile Controls

Childrens Healthy Controls



| <b>Table 7. Demographic Characteristics of Study Subjects</b> |                             |                                   |                                    |
|---------------------------------------------------------------|-----------------------------|-----------------------------------|------------------------------------|
| <b>Demographics</b>                                           | <b>Kawasaki<br/>(N= 16)</b> | <b>Febrile Control<br/>(N=11)</b> | <b>Afebrile Control<br/>(N=10)</b> |
| Age (years)                                                   | 3.2 (1.6)                   | 3.2 (2.3)                         | 4.2 (1.6)                          |
| Gender (M)                                                    | 8 (50%)                     | 1 (9%)                            | 5 (45%)                            |
| Race                                                          |                             |                                   |                                    |
| Caucasian                                                     | 9 (56%)                     | 10 (91%)                          | 10 (100%)                          |
| Black or African-<br>American                                 | 5 (31%)                     | 1 (9%)                            | 0 (0%)                             |
| Asian                                                         | 2 (13%)                     | 0 (0%)                            | 0 (0%)                             |
| Ethnicity                                                     |                             |                                   |                                    |
| Hispanic or Latino                                            | 0 (0%)                      | 0 (0%)                            | 2 (20%)                            |
| Non-Hispanic or Latino                                        | 16 (100%)                   | 11 (100%)                         | 8 (80%)                            |

Data reported as mean (SD) or n (%).



‡Rash (R), non-exudate conjunctivitis (Con), mucous membrane changes (Mu), erythema and/or painful swelling of the extremities (Ext), cervical lymphadenopathy (LN), coronary artery aneurysms (CA).

† Considered abnormal based on American Heart Association criteria [1]. Subject 1101 had an LAD z-score of +2.69 with marker perivascular brightness around the coronaries. Subject 1104 had an LAD z-score of +3.19 with perivascular edema present. Subject 1200 had coronary artery aneurysms (Y-CA) with an LAD z-score of +9.42 and an RCA z-score of +8.56.

Alb, Albumin; CRP, C-Reactive Protein; ECHO, Echocardiogram; ESR, Erythrocyte Sedimentation Rate; IU, Indiana University; IVIG, Intravenous Immunoglobulin; JIA, Juvenile Idiopathic Arthritis; KD, Kawasaki Disease; MN, Children’s Minnesota; MSSA, Methicillin-Susceptible *Staphylococcus aureus*; N/A, Not Available; Plt, Platelet Count; RSV, Respiratory Syncytial Virus; UTI, Urinary Tract Infection; WBC, White Blood Cell Count.

1. Newburger JW, Takahashi M, Gerber MA, et al. Diagnosis, treatment, and long-term management of Kawasaki disease: a statement for health professionals from the Committee on Rheumatic Fever, Endocarditis and Kawasaki Disease, Council on Cardiovascular Disease in the Young, American Heart Association. *Circulation* **2004**; 110(17): 2747-71.

| <b>Table 9. Diagnosis of Afebrile Control Subjects</b> |                                             |                            |
|--------------------------------------------------------|---------------------------------------------|----------------------------|
| <b>Subject</b>                                         | <b>Final Diagnosis</b>                      | <b>KD Algorithm Result</b> |
| 3200                                                   | Dog Bite, Facial Laceration                 | -                          |
| 3201                                                   | Supracondylar Humerus Fracture              | -                          |
| 3202                                                   | Femur Fracture                              | -                          |
| 3203                                                   | Supracondylar Humerus Fracture              | -                          |
| 3204                                                   | Ulna Fracture, Radius Fracture              | -                          |
| 3205                                                   | Tonsillar Laceration, Oral Injury           | -                          |
| 3206                                                   | Ulna Fracture, Radius Fracture              | -                          |
| 3207                                                   | Supracondylar Humerus Fracture              | -                          |
| 3208                                                   | Closed Head Injury, Concussion              | -                          |
| 3209                                                   | Closed Head Injury, Motor Vehicle Collision | -                          |

## 1 Supplement references

- 2 1. Dinarello, C.A., *Biology of interleukin 1*. FASEB J, 1988. **2**(2): p. 108-15.
- 3 2. Maury, C.P., E. Salo, and P. Pelkonen, *Circulating interleukin-1 beta in patients with Kawasaki disease*. N  
4 Engl J Med, 1988. **319**(25): p. 1670-1.
- 5 3. Arend, W.P., et al., *Interleukin-1 receptor antagonist: role in biology*. Annu Rev Immunol, 1998. **16**: p. 27-  
6 55.
- 7 4. Gabay, C., *Interleukin-6 and chronic inflammation*. Arthritis Res Ther, 2006. **8 Suppl 2**: p. S3.
- 8 5. Gattorno, M., et al., *Synovial fluid T cell clones from oligoarticular juvenile arthritis patients display a  
9 prevalent Th1/Th0-type pattern of cytokine secretion irrespective of immunophenotype*. Clin Exp Immunol,  
10 1997. **109**(1): p. 4-11.
- 11 6. Ueno, Y., et al., *The acute phase nature of interleukin 6: studies in Kawasaki disease and other febrile  
12 illnesses*. Clin Exp Immunol, 1989. **76**(3): p. 337-42.
- 13 7. Gupta, M., et al., *Cytokine modulation with immune gamma-globulin in peripheral blood of normal children  
14 and its implications in Kawasaki disease treatment*. J Clin Immunol, 2001. **21**(3): p. 193-9.
- 15 8. Kim, D.S., *Serum interleukin-6 in Kawasaki disease*. Yonsei Med J, 1992. **33**(2): p. 183-8.
- 16 9. Moore, K.W., et al., *Interleukin-10*. Annu Rev Immunol, 1993. **11**: p. 165-90.
- 17 10. Kim, D.S., et al., *Increased serum interleukin-10 level in Kawasaki disease*. Yonsei Med J, 1996. **37**(2): p.  
18 125-30.
- 19 11. Okada, Y., et al., *Effect of corticosteroids in addition to intravenous gamma globulin therapy on serum  
20 cytokine levels in the acute phase of Kawasaki disease in children*. J Pediatr, 2003. **143**(3): p. 363-7.
- 21 12. Minty, A., et al., *Interleukin-13 is a new human lymphokine regulating inflammatory and immune  
22 responses*. Nature, 1993. **362**(6417): p. 248-50.
- 23 13. Jaffe, J.S., et al., *Human lung mast cell activation leads to IL-13 mRNA expression and protein release*. Am J  
24 Respir Cell Mol Biol, 1996. **15**(4): p. 473-81.
- 25 14. Schmid-Grendelmeier, P., et al., *Eosinophils express functional IL-13 in eosinophilic inflammatory diseases*.  
26 J Immunol, 2002. **169**(2): p. 1021-7.
- 27 15. Peck, A. and E.D. Mellins, *Plasticity of T-cell phenotype and function: the T helper type 17 example*.  
28 Immunology. **129**(2): p. 147-53.
- 29 16. Jia, S., et al., *The T helper type 17/regulatory T cell imbalance in patients with acute Kawasaki disease*. Clin  
30 Exp Immunol. **162**(1): p. 131-7.
- 31 17. Ko, T.M., et al., *CXCL10/IP-10 is a biomarker and mediator for Kawasaki disease*. Circ Res, 2015. **116**(5): p.  
32 876-83.

- 33 18. Rowley, A.H., et al., *Serum interferon concentrations and retroviral serology in Kawasaki syndrome*. *Pediatr*  
34 *Infect Dis J*, 1988. **7**(9): p. 663-6.
- 35 19. Ogle, J.W., et al., *Absence of interferon in sera of patients with Kawasaki syndrome*. *Pediatr Infect Dis J*,  
36 1991. **10**(1): p. 25-9.
- 37 20. Mosmann, T.R. and R.L. Coffman, *TH1 and TH2 cells: different patterns of lymphokine secretion lead to*  
38 *different functional properties*. *Annu Rev Immunol*, 1989. **7**: p. 145-73.
- 39 21. Matsubara, T., S. Furukawa, and K. Yabuta, *Serum levels of tumor necrosis factor, interleukin 2 receptor,*  
40 *and interferon-gamma in Kawasaki disease involved coronary-artery lesions*. *Clin Immunol Immunopathol*,  
41 1990. **56**(1): p. 29-36.
- 42 22. Matsubara, T., et al., *Decreased interferon-gamma (IFN-gamma)-producing T cells in patients with acute*  
43 *Kawasaki disease*. *Clin Exp Immunol*, 1999. **116**(3): p. 554-7.
- 44 23. Darrah, P.A., et al., *Multifunctional TH1 cells define a correlate of vaccine-mediated protection against*  
45 *Leishmania major*. *Nat Med*, 2007. **13**(7): p. 843-50.
- 46 24. Furukawa, S., et al., *Serum levels of p60 soluble tumor necrosis factor receptor during acute Kawasaki*  
47 *disease*. *J Pediatr*, 1994. **124**(5 Pt 1): p. 721-5.
- 48 25. Ahn, S.Y., et al., *Tumor necrosis factor-alpha levels and promoter polymorphism in patients with Kawasaki*  
49 *disease in Korea*. *Yonsei Med J*, 2003. **44**(6): p. 1021-6.
- 50 26. Diez-Ruiz, A., et al., *Soluble receptors for tumour necrosis factor in clinical laboratory diagnosis*. *Eur J*  
51 *Haematol*, 1995. **54**(1): p. 1-8.
- 52 27. Blanchard, J.N., et al., *Recurrent Kawasaki disease-like syndrome in a patient with acquired*  
53 *immunodeficiency syndrome*. *Clin Infect Dis*, 2003. **36**(1): p. 105-11.
- 54 28. Sweet, M.J. and D.A. Hume, *CSF-1 as a regulator of macrophage activation and immune responses*. *Arch*  
55 *Immunol Ther Exp (Warsz)*, 2003. **51**(3): p. 169-77.
- 56 29. Igarashi, H., et al., *High serum levels of M-CSF and G-CSF in Kawasaki disease*. *Br J Haematol*, 1999. **105**(3):  
57 p. 613-5.
- 58 30. Oana, S., M. Terai, and Y. Kohno, *Serum M-CSF levels in Kawasaki disease*. *Br J Haematol*, 1999. **107**(2): p.  
59 462-3.
- 60 31. Hofbauer, L.C., et al., *Effects of immunosuppressants on receptor activator of NF-kappaB ligand and*  
61 *osteoprotegerin production by human osteoblastic and coronary artery smooth muscle cells*. *Biochem*  
62 *Biophys Res Commun*, 2001. **280**(1): p. 334-9.
- 63 32. Simonini, G., et al., *Osteoprotegerin serum levels in Kawasaki disease: an additional potential marker in*  
64 *predicting children with coronary artery involvement*. *J Rheumatol*, 2005. **32**(11): p. 2233-8.

- 65 33. Miller, M.D., et al., *A novel polypeptide secreted by activated human T lymphocytes*. J Immunol, 1989.  
66 **143**(9): p. 2907-16.
- 67 34. Miller, M.D., et al., *Sequence and chromosomal location of the I-309 gene. Relationship to genes encoding*  
68 *a family of inflammatory cytokines*. J Immunol, 1990. **145**(8): p. 2737-44.
- 69 35. Zingoni, A., et al., *The chemokine receptor CCR8 is preferentially expressed in Th2 but not Th1 cells*. J  
70 Immunol, 1998. **161**(2): p. 547-51.
- 71 36. Haque, N.S., et al., *Chemokine receptor-8 (CCR8) mediates human vascular smooth muscle cell chemotaxis*  
72 *and metalloproteinase-2 secretion*. Blood, 2004. **103**(4): p. 1296-304.
- 73 37. Deshmane, S.L., et al., *Monocyte chemoattractant protein-1 (MCP-1): an overview*. J Interferon Cytokine  
74 Res, 2009. **29**(6): p. 313-26.
- 75 38. Terai, M., et al., *Dramatic decrease of circulating levels of monocyte chemoattractant protein-1 in*  
76 *Kawasaki disease after gamma globulin treatment*. J Leukoc Biol, 1999. **65**(5): p. 566-72.
- 77 39. Asano, T. and S. Ogawa, *Expression of monocyte chemoattractant protein-1 in Kawasaki disease: the anti-*  
78 *inflammatory effect of gamma globulin therapy*. Scand J Immunol, 2000. **51**(1): p. 98-103.
- 79 40. Chung, H.S., et al., *Production of chemokines in Kawasaki disease, Henoch-Schonlein purpura and acute*  
80 *febrile illness*. J Korean Med Sci, 2004. **19**(6): p. 800-4.
- 81 41. Olson, T.S. and K. Ley, *Chemokines and chemokine receptors in leukocyte trafficking*. Am J Physiol Regul  
82 Integr Comp Physiol, 2002. **283**(1): p. R7-28.
- 83 42. Wong, M., E.D. Silverman, and E.N. Fish, *Evidence for RANTES, monocyte chemotactic protein-1, and*  
84 *macrophage inflammatory protein-1 beta expression in Kawasaki disease*. J Rheumatol, 1997. **24**(6): p.  
85 1179-85.
- 86 43. Liu, M., et al., *CXCL10/IP-10 in infectious diseases pathogenesis and potential therapeutic implications*.  
87 Cytokine Growth Factor Rev. **22**(3): p. 121-30.
- 88 44. Cole, K.E., et al., *Interferon-inducible T cell alpha chemoattractant (I-TAC): a novel non-ELR CXC chemokine*  
89 *with potent activity on activated T cells through selective high affinity binding to CXCR3*. J Exp Med, 1998.  
90 **187**(12): p. 2009-21.
- 91 45. Johansson, C., et al., *Differential expression of chemokine receptors on human IgA+ and IgG+ B cells*. Clin  
92 Exp Immunol, 2005. **141**(2): p. 279-87.
- 93 46. Olszyna, D.P., et al., *Levels of inhibitors of tumor necrosis factor alpha and interleukin 1beta in urine and*  
94 *sera of patients with urosepsis*. Infect Immun, 1998. **66**(8): p. 3527-34.
- 95 47. Noh, G.W., et al., *Effects of intravenous immunoglobulin on plasma interleukin-10 levels in Kawasaki*  
96 *disease*. Immunol Lett, 1998. **62**(1): p. 19-24.



- 97 48. Chung, H.L., et al., *Age-related difference in immune responses to respiratory syncytial virus infection in*  
98 *young children*. *Pediatr Allergy Immunol*, 2007. **18**(2): p. 94-9.
- 99 49. Sohn, M.H., et al., *Circulating interleukin 17 is increased in the acute stage of Kawasaki disease*. *Scand J*  
100 *Rheumatol*, 2003. **32**(6): p. 364-6.
- 101 50. Furukawa, S., et al., *Kawasaki disease differs from anaphylactoid purpura and measles with regard to*  
102 *tumour necrosis factor-alpha and interleukin 6 in serum*. *Eur J Pediatr*, 1992. **151**(1): p. 44-7.
- 103 51. Korematsu, S., et al., *The characterization of cerebrospinal fluid and serum cytokines in patients with*  
104 *Kawasaki disease*. *Pediatr Infect Dis J*, 2007. **26**(8): p. 750-3.
- 105 52. Shikishima, Y., T. Saeki, and N. Matsuura, *Chemokines in Kawasaki disease: measurement of CCL2, CCL22*  
106 *and CXCL10*. *Asian Pac J Allergy Immunol*, 2003. **21**(3): p. 139-43.
- 107 53. Antonelli, A., et al., *High serum levels of CXCL11 in mixed cryoglobulinemia are associated with increased*  
108 *circulating levels of interferon-gamma*. *J Rheumatol*. **38**(9): p. 1947-52.

109

110
